# Supplementary figures and images for: Familial amyotrophic lateral sclerosis with frontotemporal dementia is linked to a locus on chromosome 9p13.2–21.3
Source: Oxford University Press journal article supplement (doi:10.1093/brain/awl030), 2006-02-22

**Affecteds only Multipoint LOD scores**  
Merlin SNP chip data

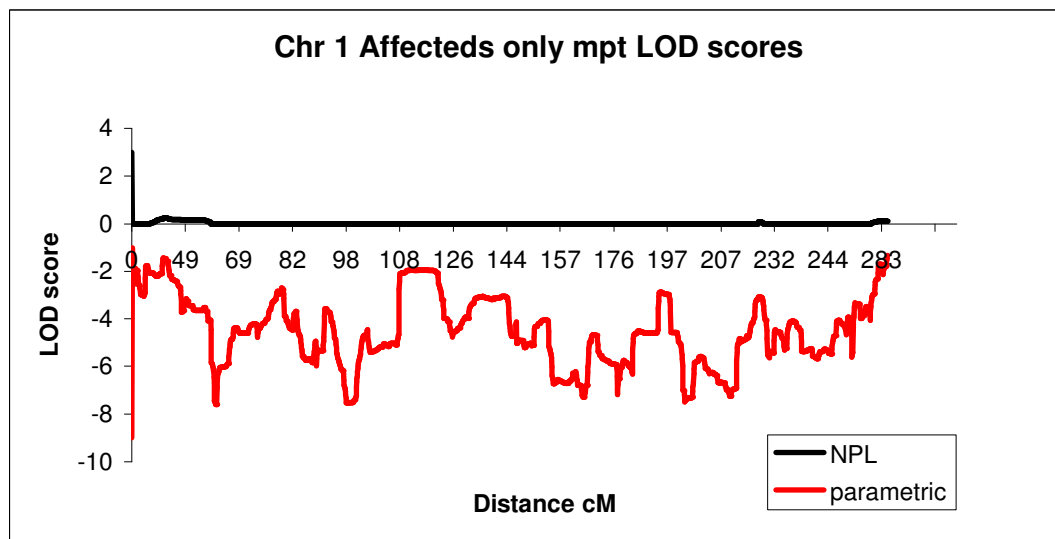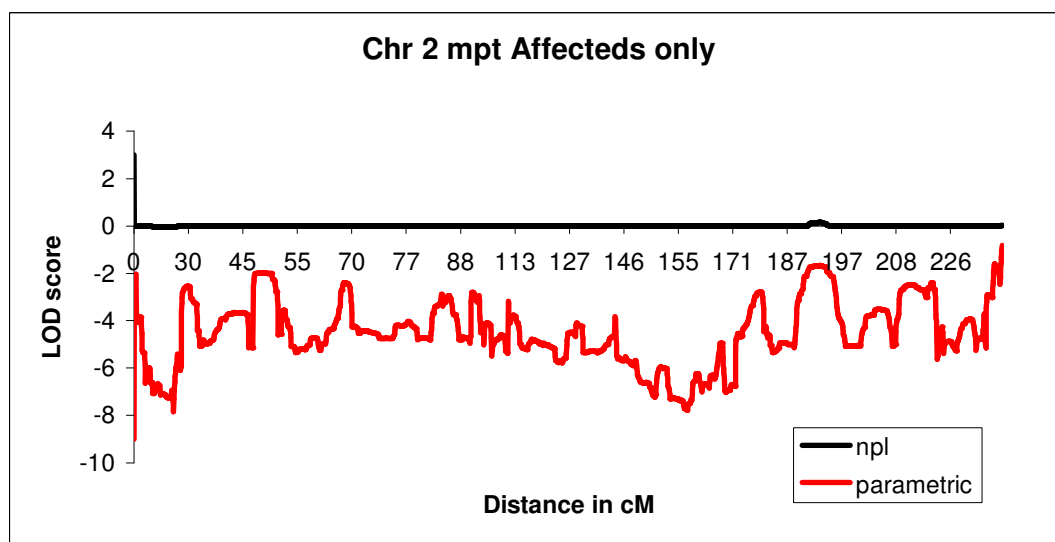

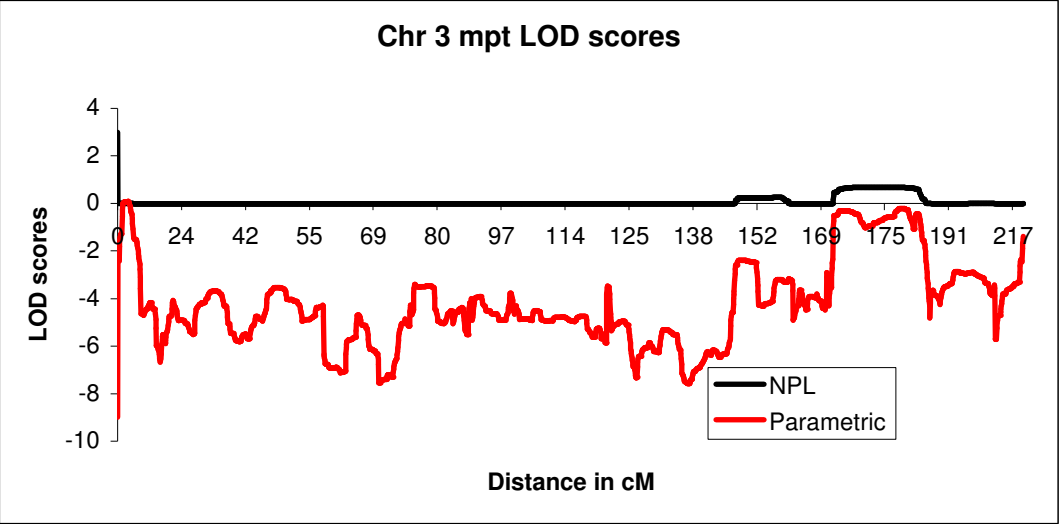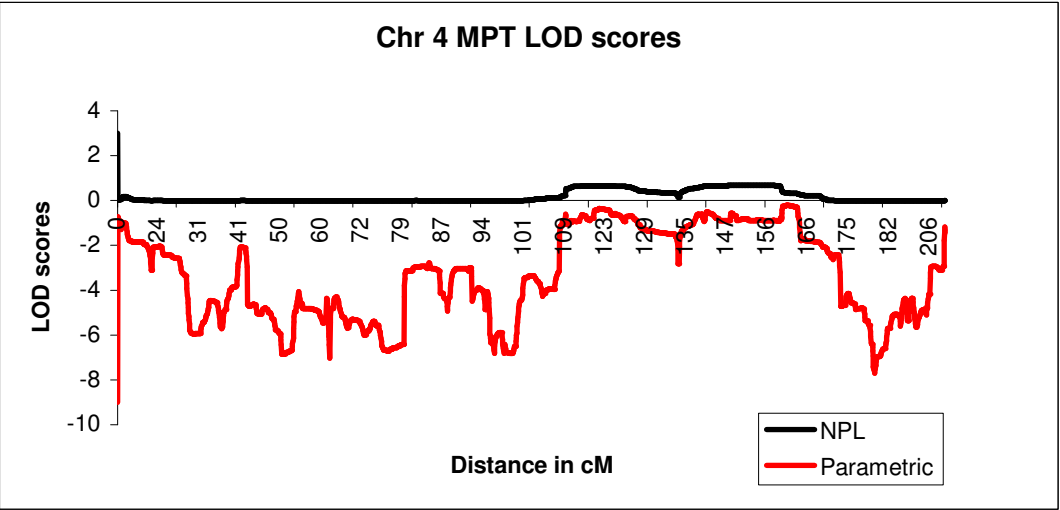

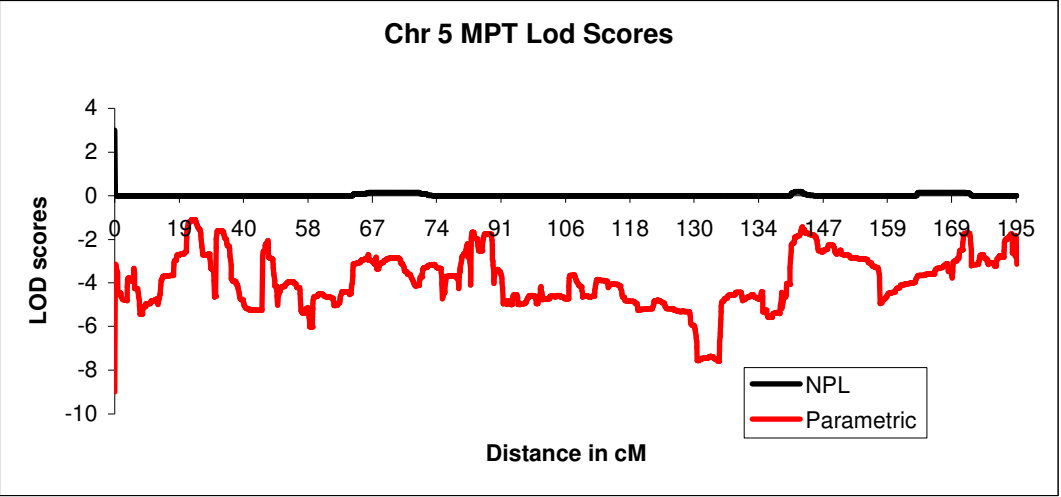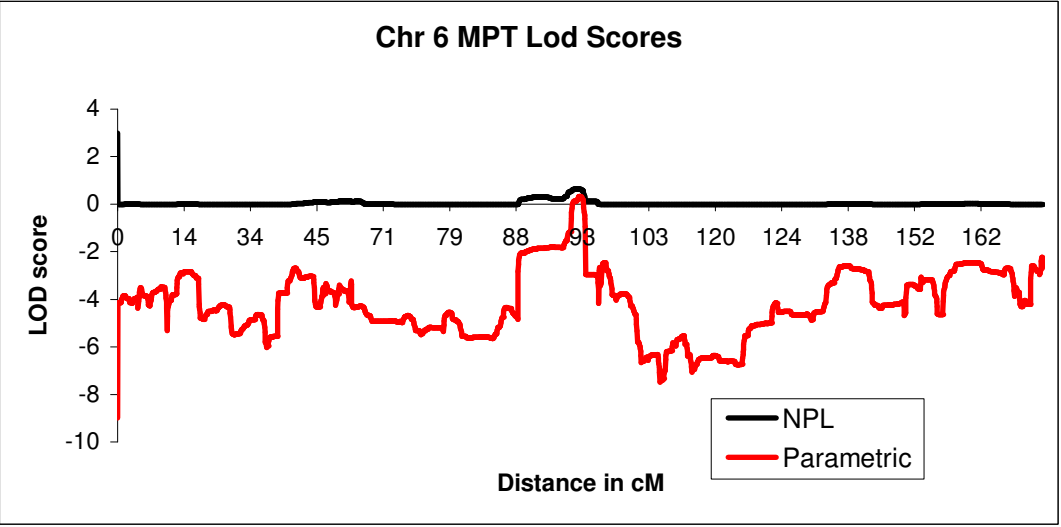

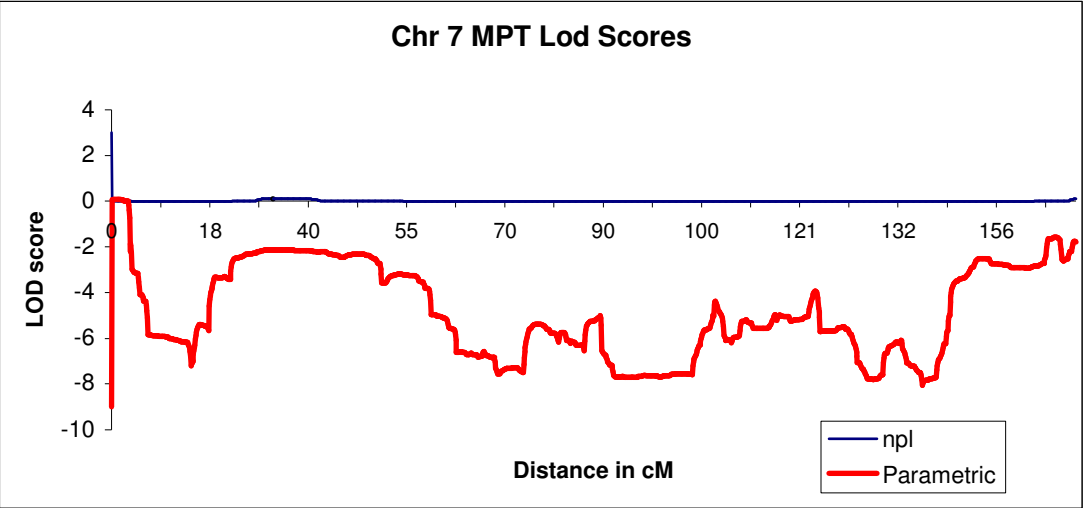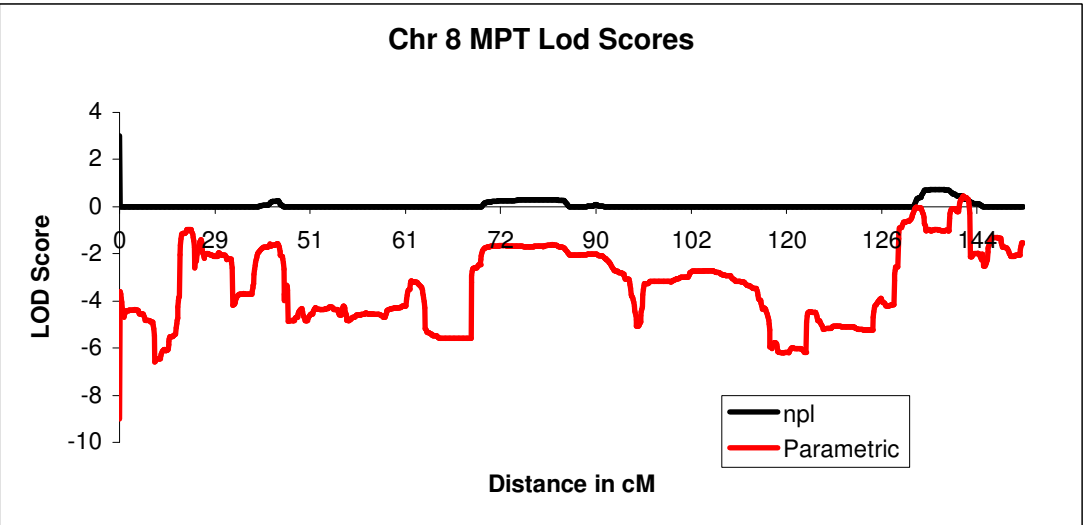

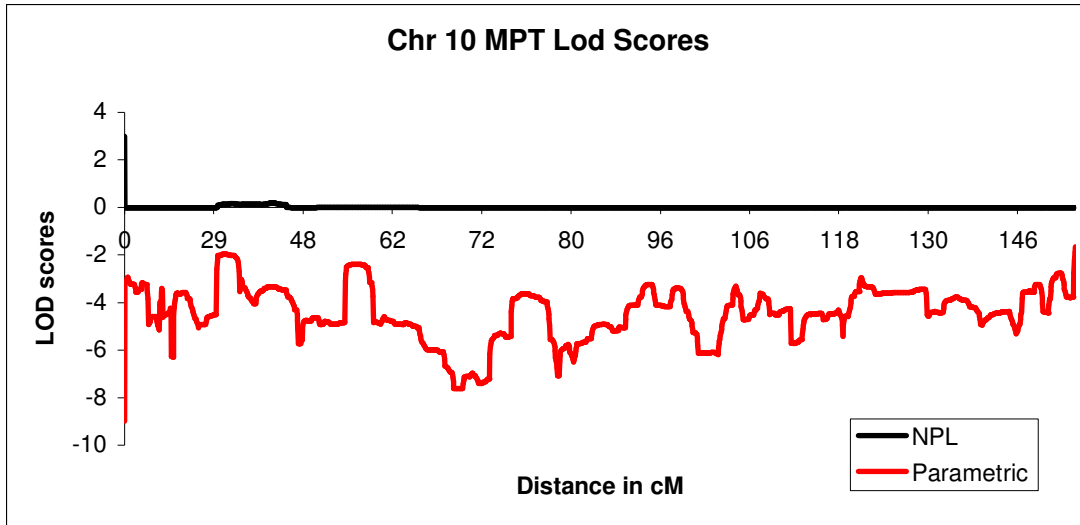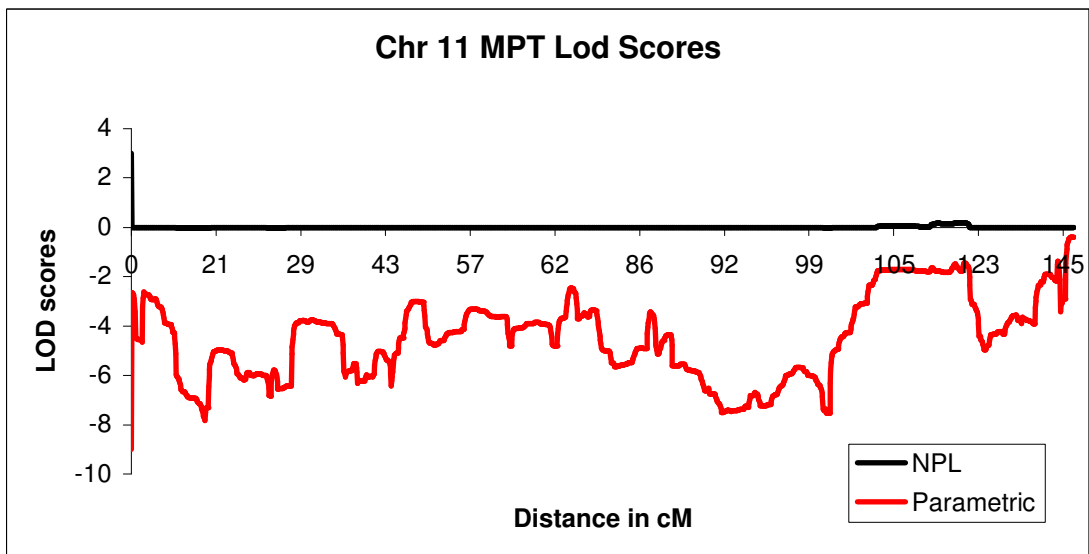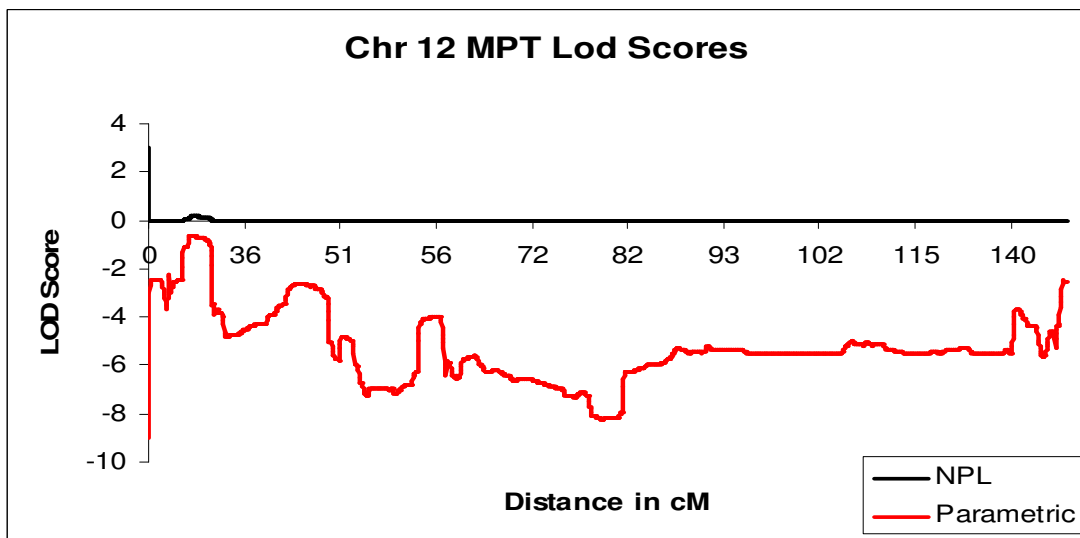

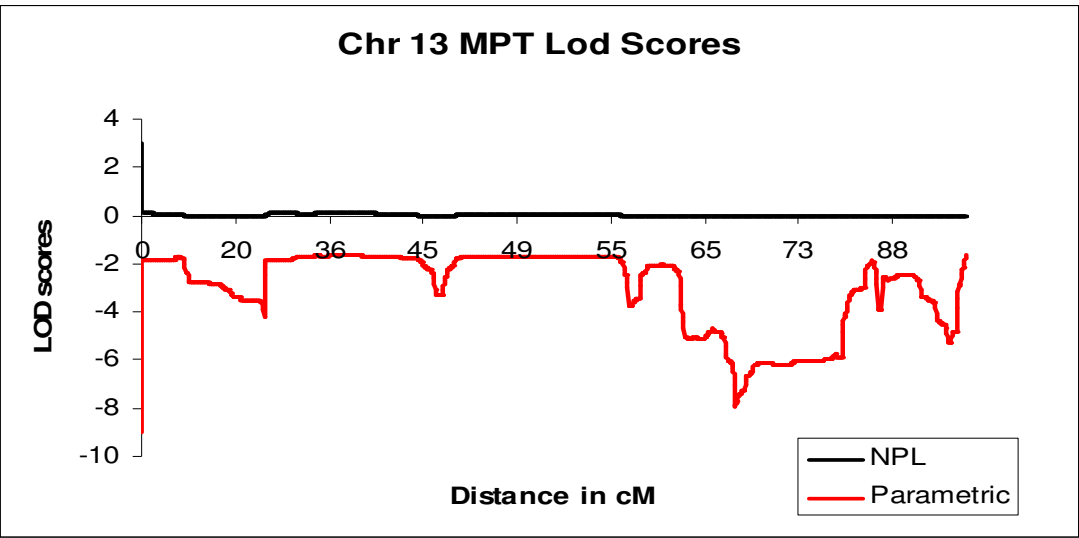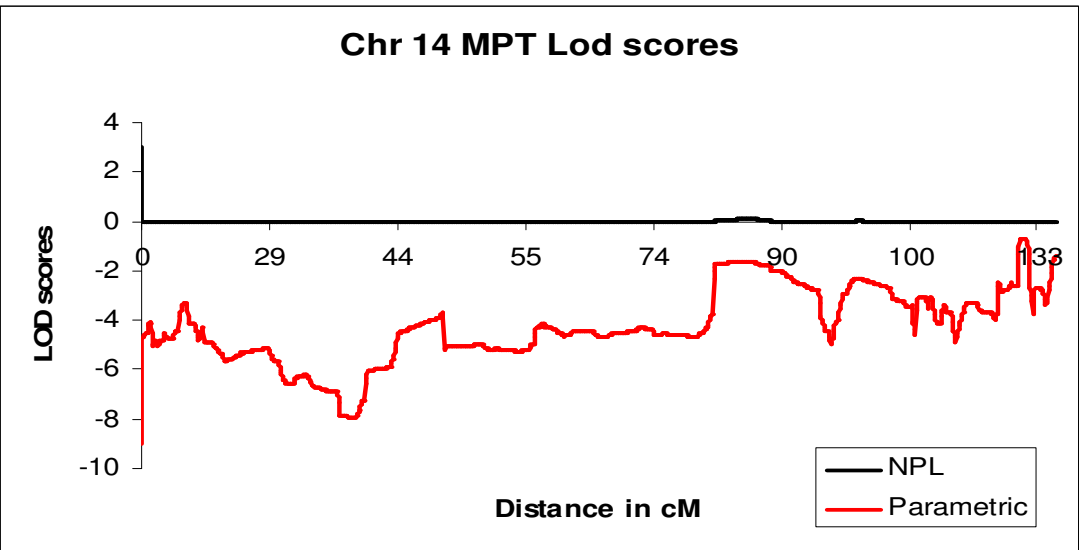

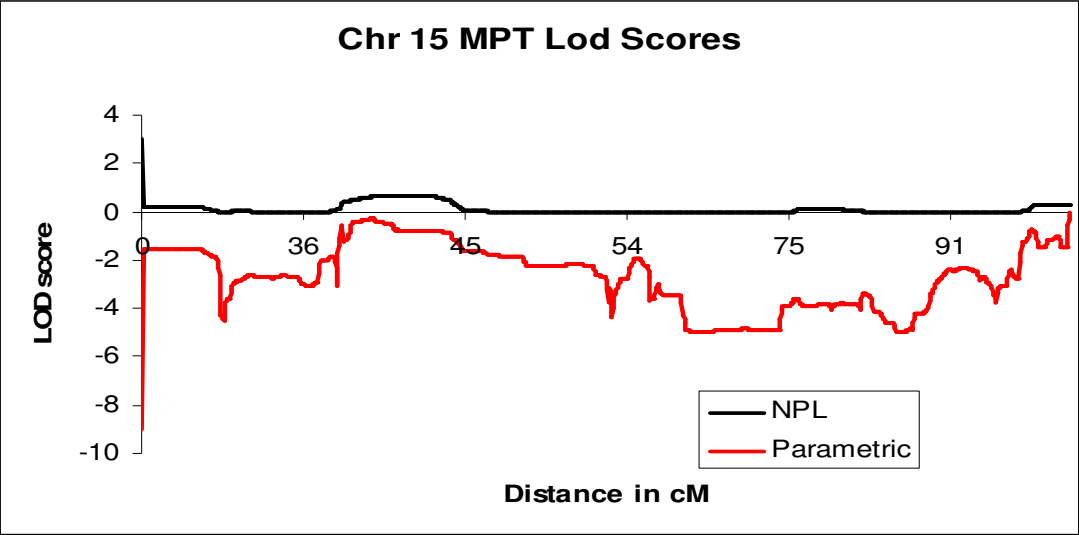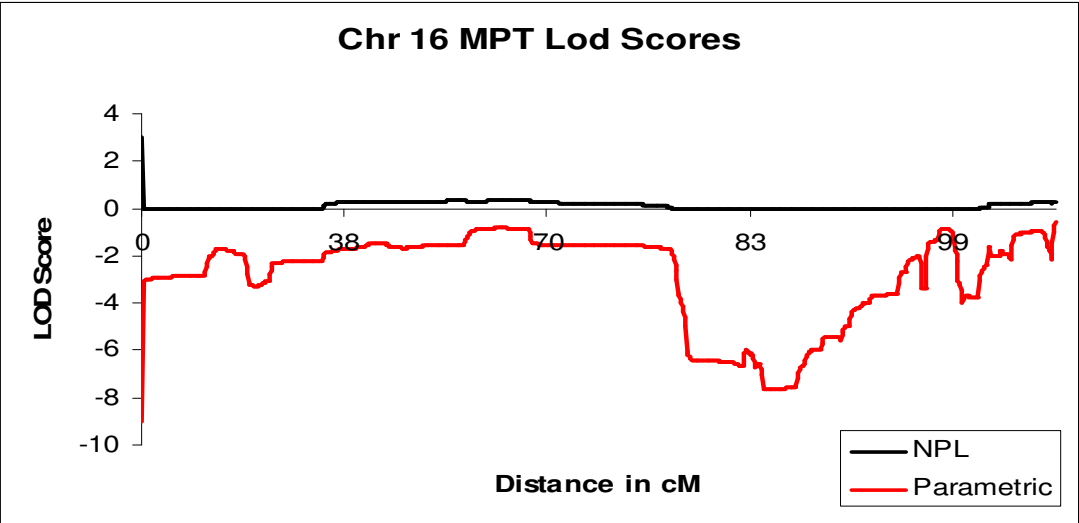

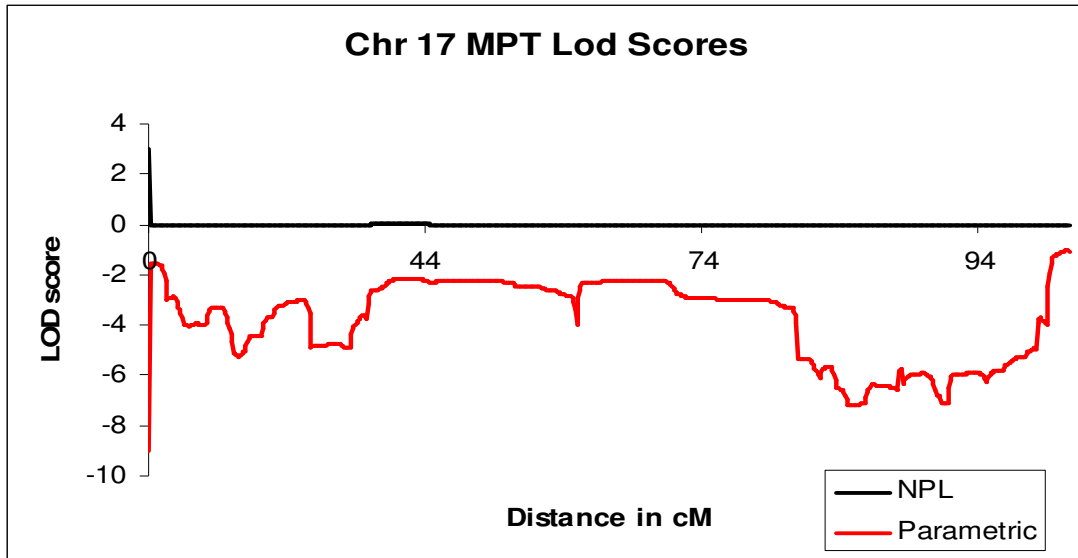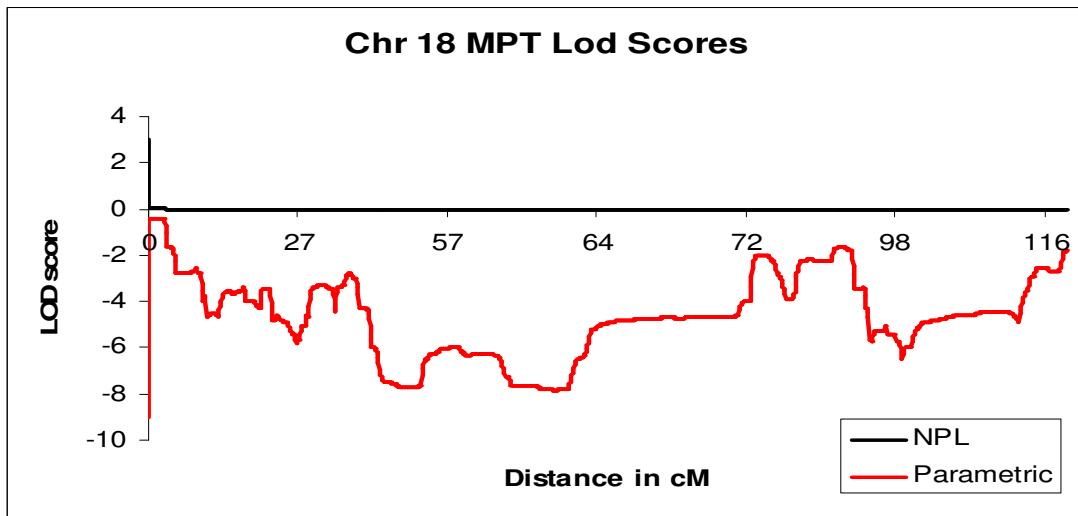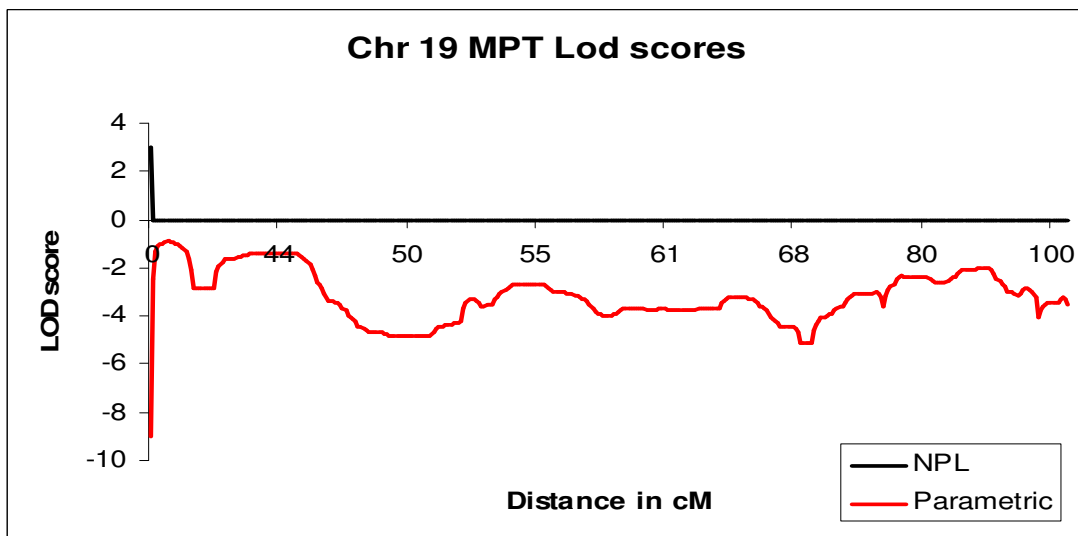



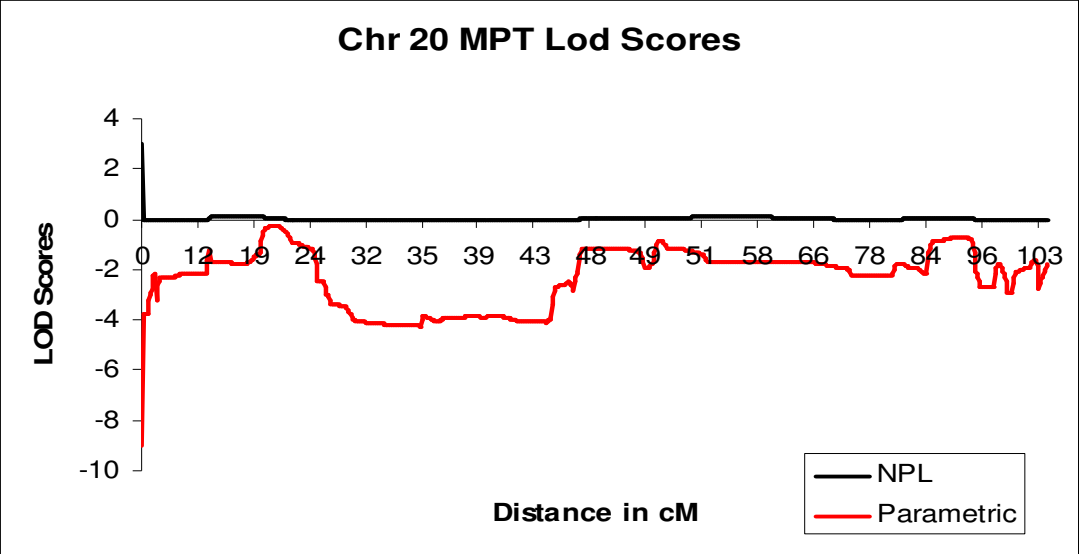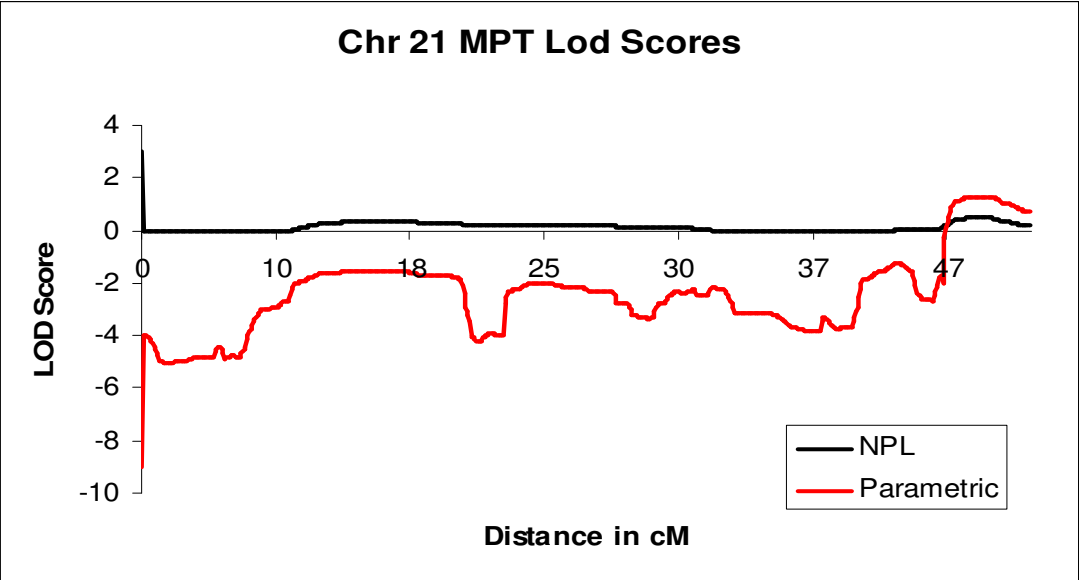

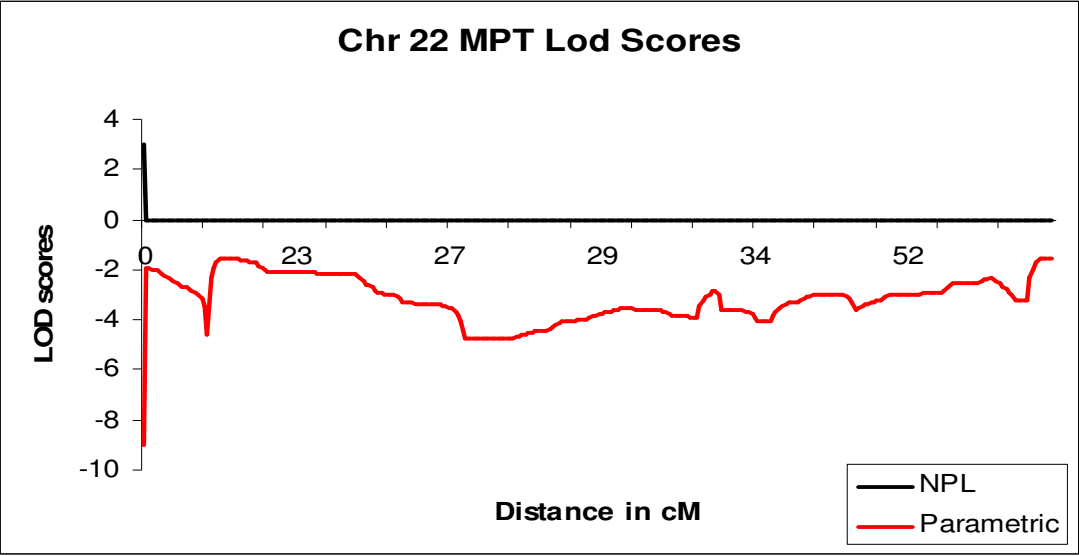

Supplement: awl030_Supplementary_Data.zip [file awl030_Supplementary_Data.zip]
